# Supplementary material
Source: PubMed Central journal article supplement (PMC3220589)
Supplement: supp_M111.273482_jbc.M111.273482-2.pdf [file supp_M111.273482_jbc.M111.273482-2.pdf]

TABLE 1

**Primers used for  $\beta$ c K16R and  $\Delta$ Box1 mutagenesis**

|                                   |                                                         |
|-----------------------------------|---------------------------------------------------------|
| 5'- $\beta$ c-K1,2R- aa 457,461   | GGGTACAGGCTGCGCAGAAGGTGGGAGGAGAGGATCCCCAACCCCAGC        |
| 5'- $\beta$ c-K3R- aa 467         | ATCCCCAACCCCAGCAGGAGCCACCTGTTCCAGAAC                    |
| 5'- $\beta$ c-K4R- aa 527         | CTCACCATAGAGGACCCCAGGCATGTCTGTGATCCA                    |
| 5'- $\beta$ c-K5R- aa 566         | GCCTCCACACACCTGAGAGACAGGCTTCCAGCTTT                     |
| 5'- $\beta$ c-K6R- aa 603         | CAGGAGGGTGGGAGCCAGAGGTCCCCACCTCCAGGG                    |
| 5'- $\beta$ c-K7R- aa 673         | GTGGGAGGACAGGACCAAAGGGACAGCCCTGTGGCT                    |
| 5'- $\beta$ c-K8R- aa 744         | GGAGCCCCAGGCCCTGTGAGGTCAGGGTTTGAGGGC                    |
| 5'- $\beta$ c-K9R- aa 774         | CCTGTCCCCCTGAGGCCAGAAGCCCTGTCCTGAAC                     |
| 5'- $\beta$ c-K10R- aa 822        | CCTCTCTCGCTCCGGAGTAGACCTTCTTCCCCGGGA                    |
| 5'- $\beta$ c-K11R- aa 833        | GGACCCGGTCCTGAGATCAGGAACCTAGACCAGGCT                    |
| 5'- $\beta$ c-K12,13R- aa 842,843 | GACCAGGCTTTTCAAGTCAGGAGGCCCCCAAGCCAGGCT                 |
| 5'- $\beta$ c-K14,15R- aa 859,862 | CCCGTCATTAGCTCTTCAGAGCCCTGAGGCCAGCAGGACTACCTG           |
| 5'- $\beta$ c-K16R- aa 876        | CCCCCTTGGGAGGTCAACAGGCCTGGGGAGGTGTGT                    |
| 5'- $\beta$ c $\Delta$ Box1       | gAC ATC CTg ggC Cag CCg gAg ggT ggg AgC Cag AAg TCC CCA |
| 3'- $\beta$ c $\Delta$ Box1       | ATA ACC AgA ggC CAC TCC Agg CAT ggg TAT AgC CAC Agg gCT |
