# Supplementary material
Source: PubMed Central journal article supplement (PMC3220589)

Suppl. Figure 1

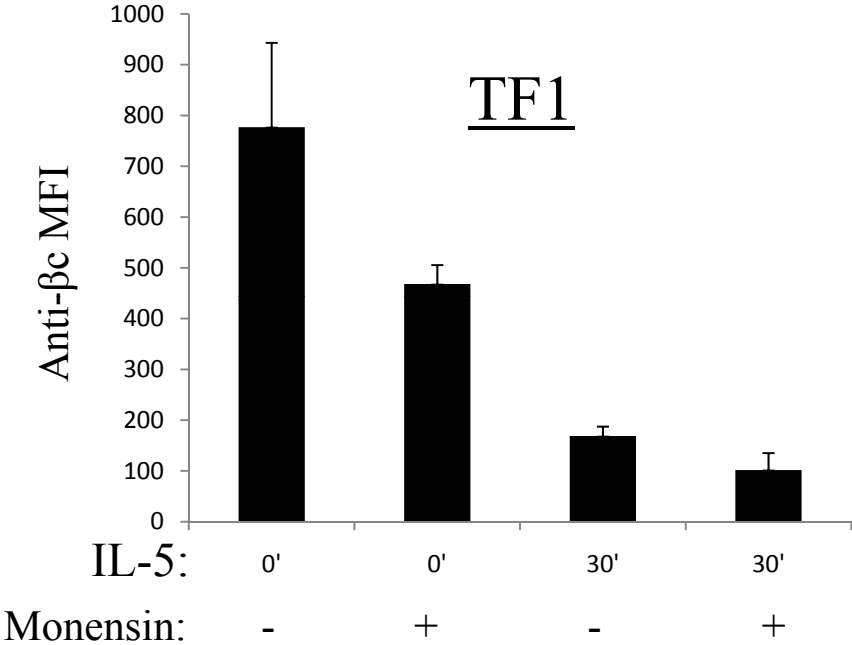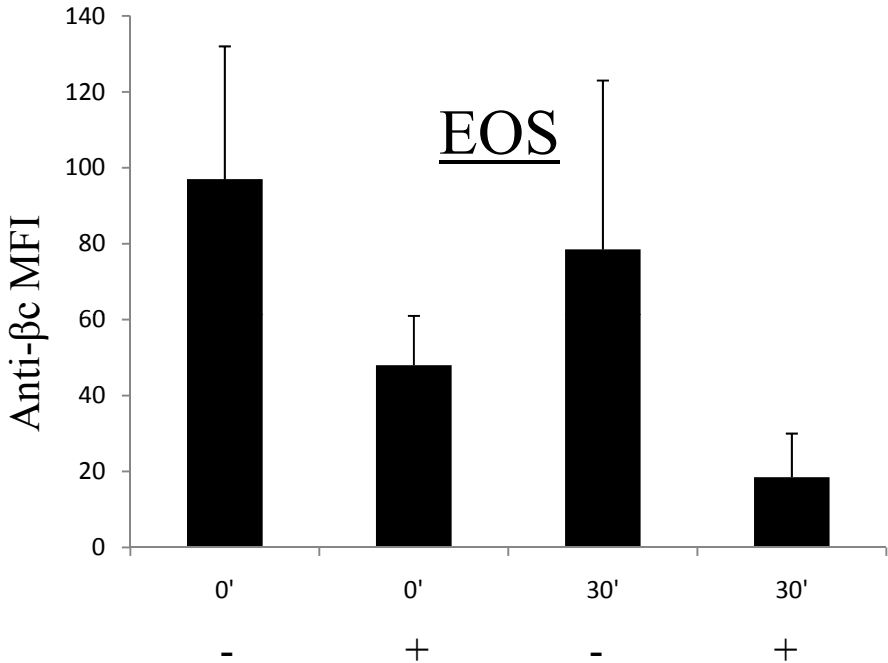

Supplement: supp_M111.273482_jbc.M111.273482-3.pdf [file supp_M111.273482_jbc.M111.273482-3.pdf]

Suppl. Figure 2

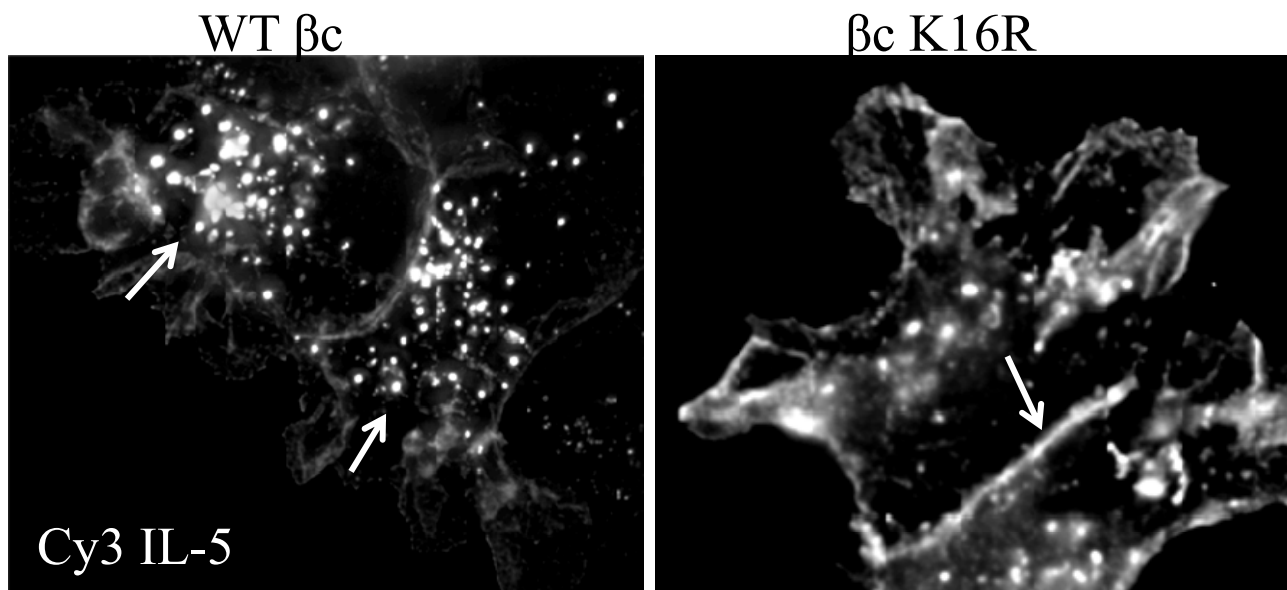

Supplement: supp_M111.273482_jbc.M111.273482-4.pdf [file supp_M111.273482_jbc.M111.273482-4.pdf]

# Suppl. Figure 3

A.

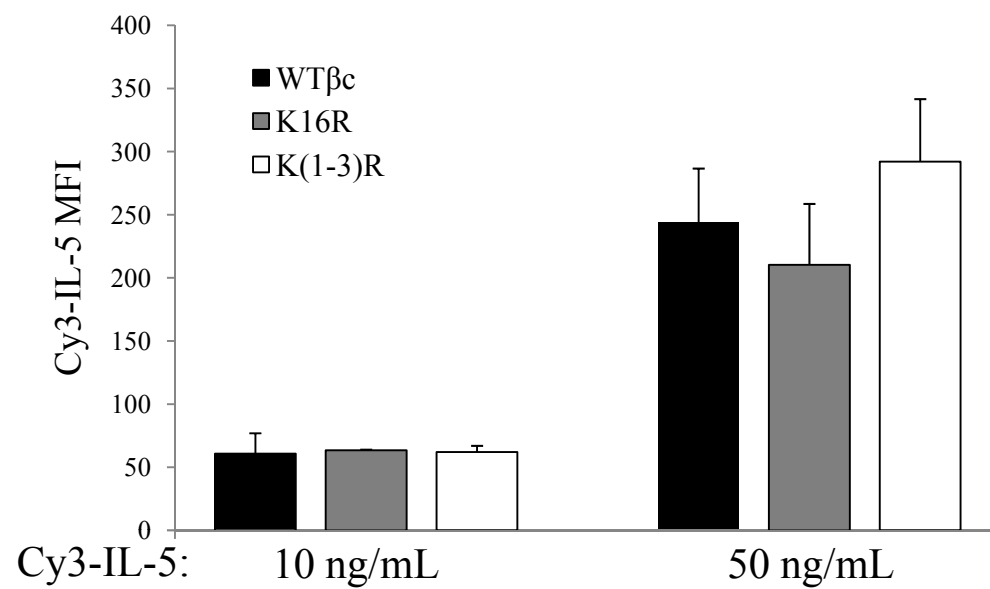

B.

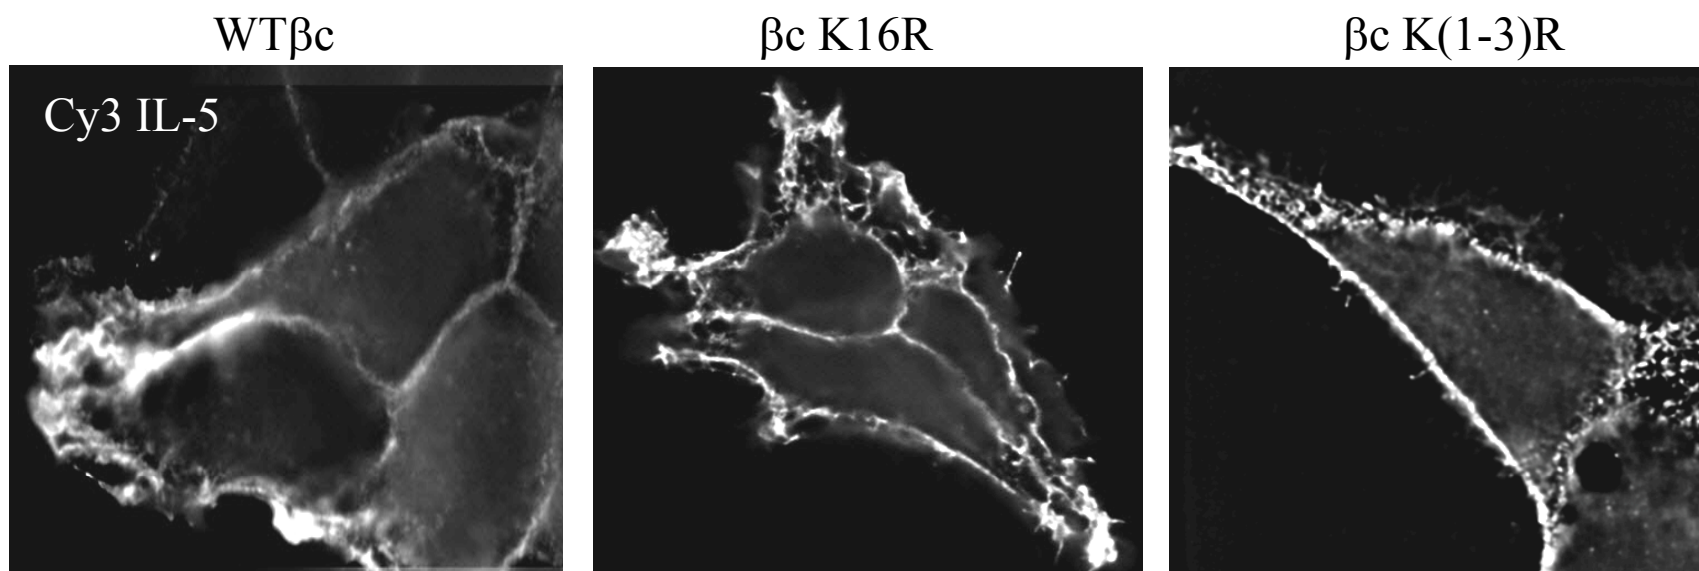

Supplement: supp_M111.273482_jbc.M111.273482-5.pdf [file supp_M111.273482_jbc.M111.273482-5.pdf]

Suppl. Figure 4

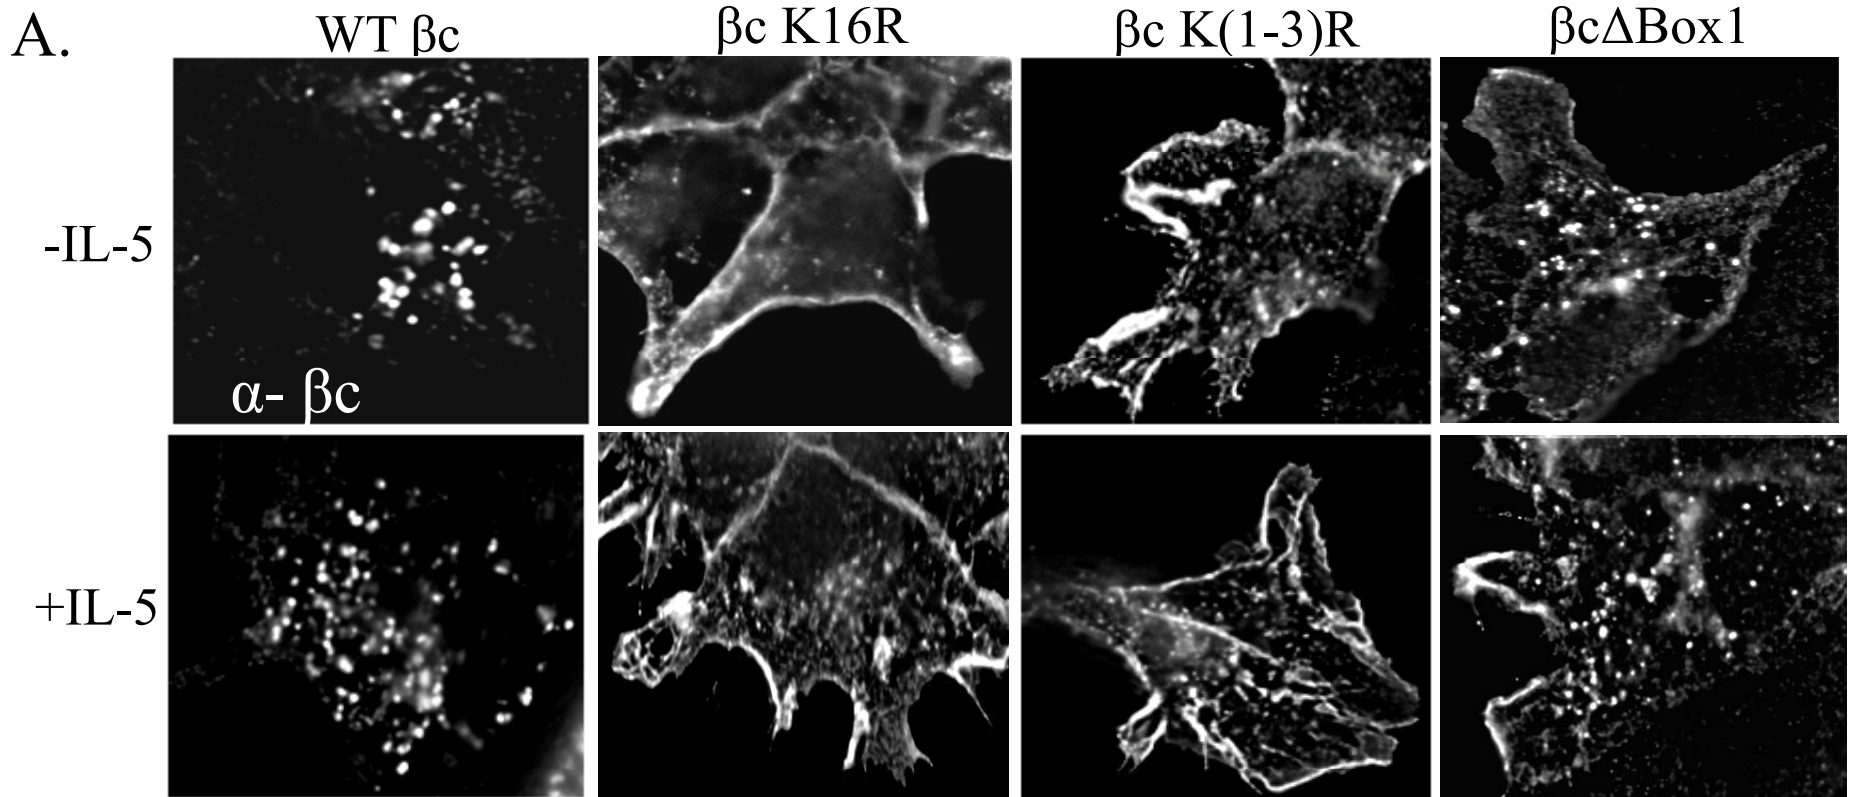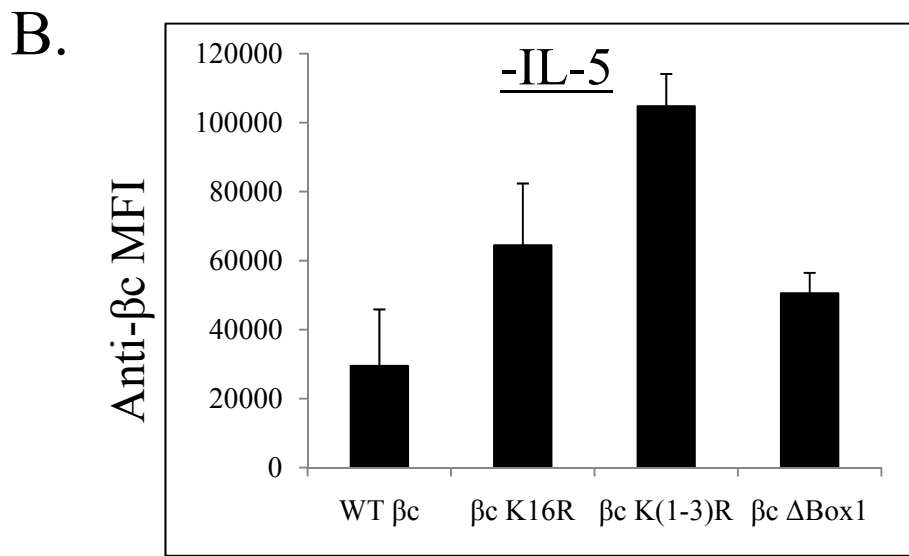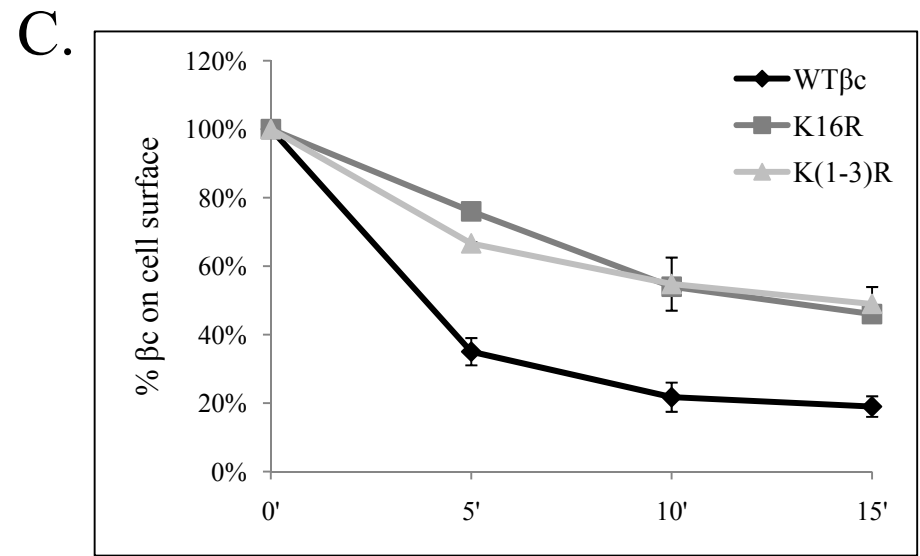

Supplement: supp_M111.273482_jbc.M111.273482-6.pdf [file supp_M111.273482_jbc.M111.273482-6.pdf]
